# Supplementary material for: Positive efficacy of Lactiplantibacillus plantarum MH-301 as a postoperative adjunct to endoscopic sclerotherapy for internal hemorrhoids: a randomized, double-blind, placebo-controlled trial
Source: Royal Society of Chemistry journal article supplement (doi:10.1039/d3fo02936k), 2023-01-01
Supplement: d3fo02936k1.pdf [file d3fo02936k1.pdf]

**Supplementary Materials:**

**Table S1** Improvement rate of ITT and PP analysis

| Improvement rate | <b>Lp (n,%)</b> | <b>C (n,%)</b> | <b>P value</b> |
|------------------|-----------------|----------------|----------------|
| <b>ITT</b>       | 44(86.27%)      | 36(69.23%)     | 0.038          |
| <b>PP</b>        | 43(87.8%)       | 33(70.2%)      | 0.045          |

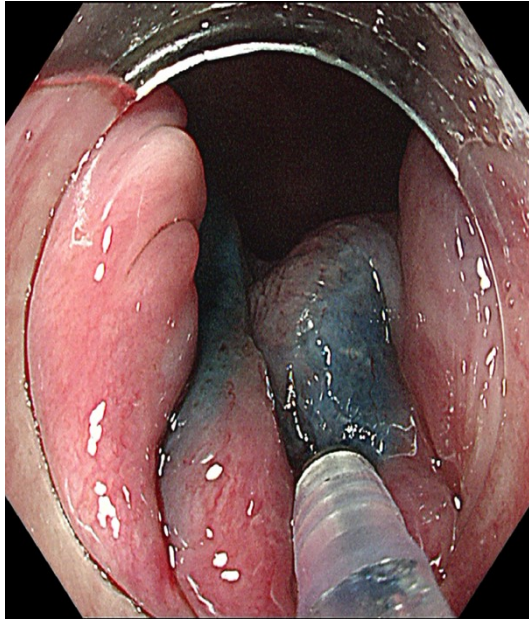

**Figure S1** Lauromacrogol injection was injected endoscopically under the mucous membrane of internal hemorrhoids

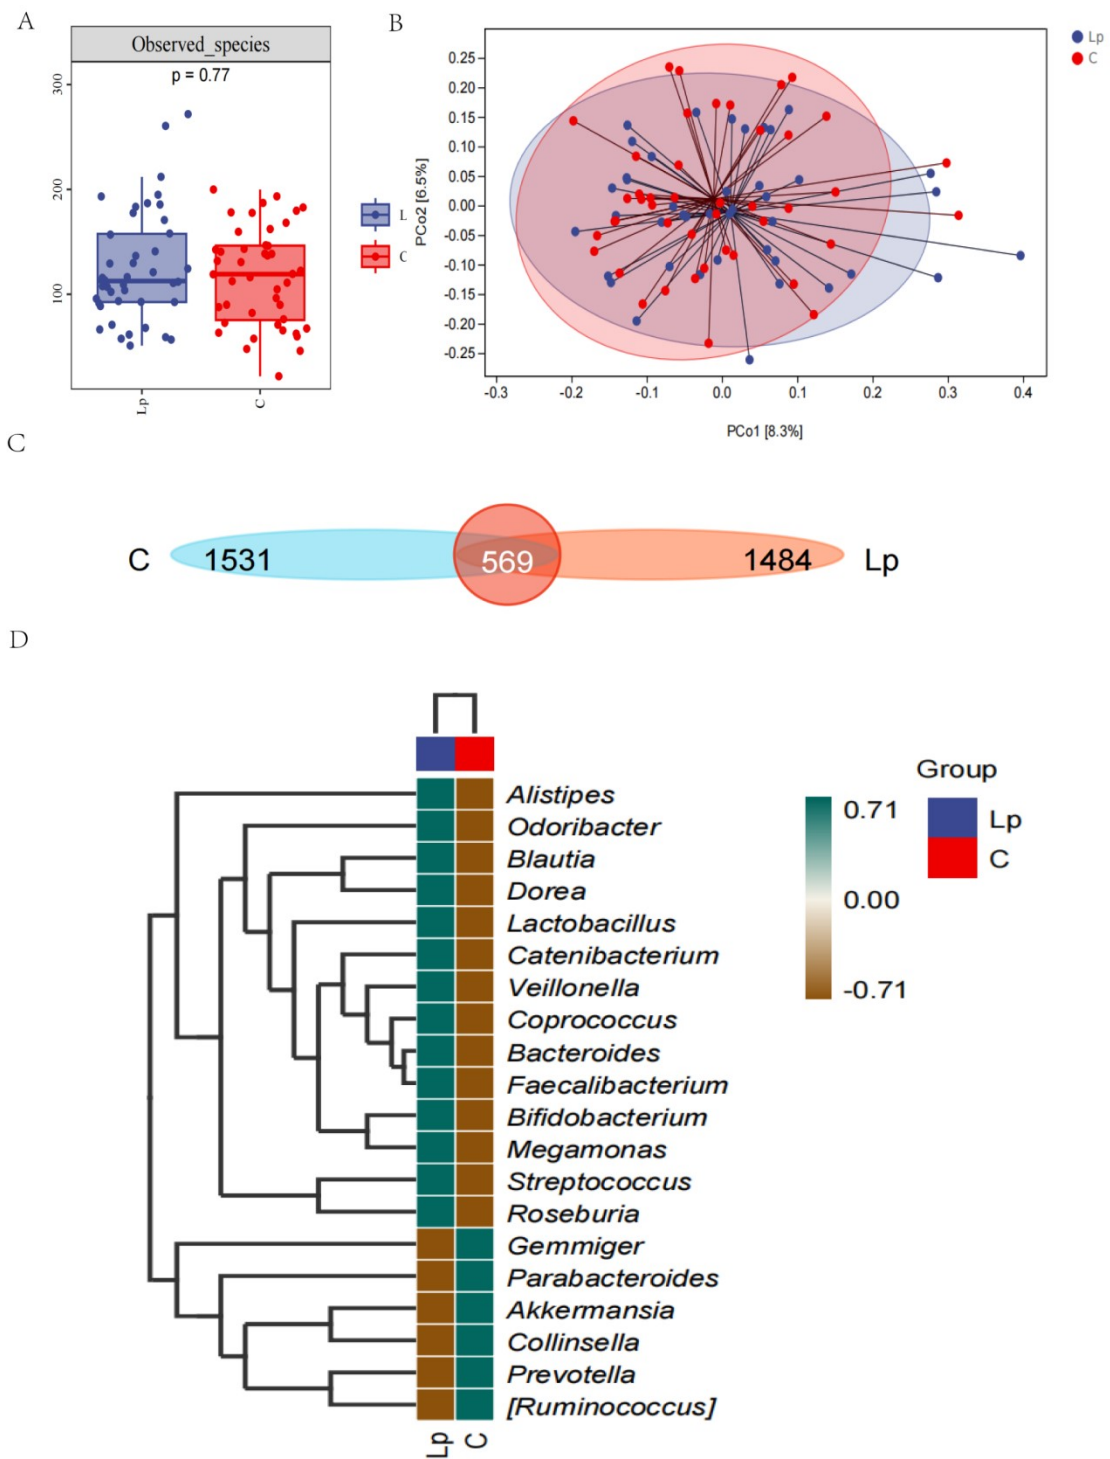

Figure S2 (A) The Observed species index. (B) PCoA of  $\beta$ -diversity based on the Unweighted unifrac distances. (C) The Venn diagram. (D) Clustering heat map.
